# COVID-19 vaccination coverage by company size and the effects of socioeconomic factors and workplace vaccination in Japan: a cohort study

Koji Mori<sup>1\*</sup>, Takahiro Mori<sup>1</sup>, Tomohisa Nagata<sup>1</sup>, Hajime Ando<sup>2</sup>, Ayako Hino<sup>3</sup>, Seiichiro Tateishi<sup>4</sup>, Mayumi Tsuji<sup>5</sup>, Keiji Muramatsu<sup>6</sup>, Yoshihisa Fujino<sup>7</sup> for the CORoNa Work Project

<sup>1</sup>Department of Occupational Health Practice and Management, Institute of Industrial Ecological Sciences, University of Occupational and Environmental Health, Japan, 1-1 Iseigaoka, Yahatanishi-ku, Kitakyushu 807-8555, Japan

<sup>2</sup>Department of Work Systems and Health, Institute of Industrial Ecological Sciences, University of Occupational and Environmental Health, Japan

<sup>3</sup>Department of Mental Health, Institute of Industrial Ecological Sciences, University of Occupational and Environmental Health, Japan, 1-1 Iseigaoka, Yahatanishi-ku, Kitakyushu 807-8555, Japan

<sup>4</sup>Department of Occupational Medicine, School of Medicine, University of Occupational and Environmental Health, Japan, 1-1 Iseigaoka, Yahatanishi-ku, Kitakyushu 807-8555, Japan

<sup>5</sup>Department of Environmental Health, School of Medicine, University of Occupational and Environmental Health, Japan, 1-1 Iseigaoka, Yahatanishi-ku, Kitakyushu 807-8555, Japan

<sup>6</sup>Department of Preventive Medicine and Community Health, School of Medicine, University of Occupational and Environmental Health, Japan, 1-1 Iseigaoka, Yahatanishi-ku, Kitakyushu 807-8555, Japan

<sup>7</sup>Department of Environmental Epidemiology, Institute of Industrial Ecological Sciences, University of Occupational and Environmental Health, Japan, 1-1 Iseigaoka, Yahatanishi-ku, Kitakyushu 807-8555, Japan

\* Corresponding author: Koji Mori, [kmori@med.uoeh-u.ac.jp](mailto:kmori@med.uoeh-u.ac.jp)

Short title: COVID-19 vaccination coverage by company size

Total word count: 3369 (6400 max)



1 **Abstract**

2 **Background:** Vaccination is considered the most effective control measure against  
3 COVID-19. Vaccine hesitancy and equitable vaccine allocation are important challenges to  
4 disseminating developed vaccines. To promote COVID-19 vaccination coverage, the  
5 government of Japan established the workplace vaccination program. However, while it  
6 appears that the program was effective in overcoming vaccine hesitancy, the program may  
7 have hindered the equitable allocation of vaccines because it mainly focused on employees of  
8 large companies. We investigated the relationship between company size and COVID-19  
9 vaccination completion status of employees and the impact of the workplace vaccination  
10 program on this relationship.

11 **Methods:** We conducted an internet-based prospective cohort study from December 2020  
12 (baseline) to December 2021. The data were collected using a self-administered questionnaire  
13 survey. Briefly, 27,036 workers completed the questionnaire at baseline and 18,560 at  
14 follow-up. After excluding ineligible respondents, we finally analyzed the data from 15,829  
15 participants. At baseline, the participants were asked about the size of the company they  
16 worked for, and at follow-up they were asked about the month in which they received their  
17 second COVID-19 vaccine dose and the availability of a company-arranged vaccination  
18 opportunity.

19 **Results:** In each month throughout the observation period, the odds of having received a

20 second COVID-19 vaccine dose were significantly lower for small-company employees than  
21 for large-company employees in the sex- and age-adjusted model. This difference decreased  
22 after adjusting for socioeconomic factors, and there was no significant difference after  
23 adjusting for the availability of a company-arranged vaccination opportunity.

24 **Conclusions:** The workplace vaccination program implemented in Japan to control the  
25 COVID-19 pandemic may have been effective in overcoming vaccine hesitancy in workers;  
26 however, it may have caused an inequitable allocation of vaccines between companies of  
27 different sizes. Because people who worked for small companies were less likely to be  
28 vaccinated, it will be necessary to enhance support of vaccination for this population in the  
29 event of future infectious disease outbreaks.

30 **Trial registration:** Not applicable.

31

32 **Keywords:** COVID-19, Vaccine hesitancy, Equitable allocation, Workplace vaccination,  
33 Company size, Socioeconomic factors

34

## 35 Introduction

36 Vaccination programs are underway worldwide because vaccination is the most effective  
37 measure to control the coronavirus disease 2019 (COVID-19) pandemic, which was declared  
38 by the World Health Organization (WHO) in March 2020. Since the outbreak of COVID-19  
39 in China in December 2019 [1], various types of vaccines have been developed in a short  
40 period of time [2]. Some of these are mRNA vaccines, representing a new type of vaccine  
41 technology [3].

42         Disseminating vaccines presents many challenges, among which vaccine hesitancy  
43 and equitable allocation are prominent. Vaccine hesitancy, defined as the “delay in  
44 acceptance or refusal of vaccination despite the availability of vaccination services” is  
45 considered a major public health challenge in infectious disease control because it delays  
46 vaccination of the population and inhibits the acquisition of herd immunity [4]. Various  
47 factors, including socioeconomic [5] and psychological factors [4], have been found to  
48 contribute to people’s vaccine hesitancy. Such factors have also been examined in the context  
49 of COVID-19 vaccination [6,7]. The equitable allocation of vaccines is based on maintaining  
50 equity in the order of vaccination according to risk regardless of social status, for example by  
51 starting with healthcare workers and those at higher risk of serious illness [8].

52         In Japan, the majority of the population had some level of initial vaccine hesitancy to  
53 receive a COVID-19 vaccine [9,10]. Nevertheless, by the end of December 2021,

54 approximately 80% of the population had received two vaccine doses [11]. In Japan,  
55 COVID-19 vaccination efforts began on February 17, 2021 using two mRNA vaccines: one  
56 from Pfizer Inc. and one from Moderna Inc. In consideration of equitable vaccine allocation,  
57 the vaccination of healthcare workers was followed by the vaccination of older adults [12].  
58 Thereafter, vaccination progressed through the general population in stages according to age.

59 An aspect of COVID-19 vaccination in Japan has been the availability of vaccination  
60 at workplaces in addition to community settings provided by municipalities and clinics [12].  
61 Compared with other developed countries, the start of the vaccination program was delayed  
62 in Japan. To make up for this delay, the government appointed a minister to be in charge and  
63 set a goal of administering one million vaccinations per day. Part of the vaccination strategy  
64 was to implement the opportunity for workplace vaccination, which was conducted mainly by  
65 occupational health professionals such as occupational physicians and occupational health  
66 nurses. As a result, 9,654,000 people received their second vaccine dose through the  
67 workplace vaccination program, which started on June 21, 2021 [13]. Workplace vaccination,  
68 which provides a convenient vaccination opportunity, may have reduced vaccine hesitancy  
69 because several psychological and social factors can positively influence a person's  
70 vaccination decision.

71 The workplace COVID-19 vaccination program in Japan, however, may have  
72 negatively affected the equitable allocation of vaccine doses. This program primarily targeted

73 large companies, with a minimum of 2,000 doses to be delivered to a single location (i.e., an  
74 expected vaccination coverage of at least 1,000 persons [13]). Thus, there were barriers to its  
75 implementation in small and medium-sized companies. Therefore, company size may have  
76 affected the timing and coverage of employees receiving the second COVID-19 vaccine dose.

77 We hypothesized that while the workplace vaccination program facilitated  
78 COVID-19 vaccination, there was a size-dependent difference among companies in the  
79 timing of employees receiving the second vaccine dose and that this difference was  
80 influenced by the availability of a company-arranged vaccination opportunity. In a survey  
81 conducted in Japan during the COVID-19 pandemic, there were differences in the  
82 implementation of infection control measures and the opportunity to work remotely  
83 depending on the size of the company [14,15]. Disparities in occupational health measures,  
84 such as workplace environmental and health measures, have arisen and depend on the size of  
85 the company. Such disparities have also been found in the establishment of COVID-19  
86 countermeasures. Therefore, rather than the government's workplace vaccination program  
87 ensuring vaccine equity, this program may have increased disparities in infection risk because  
88 of differences in the completion of COVID-19 vaccination based on company size.

89 We conducted a prospective cohort study to examine the relationship between  
90 company size and COVID-19 vaccination completion and the impact of the workplace  
91 vaccination program on this relationship, focusing on the period between July and December



92 2021, when the general population in Japan was receiving the second vaccine dose.

93

## 94 **Methods**

### 95 **Study design and participants**

96 This study was a part of the Collaborative Online Research on Novel-coronavirus Work  
97 Study (the CORoNa Work Study) and was conducted using a prospective cohort study design.  
98 The survey was commissioned to the internet survey company Cross Marketing Inc. (Tokyo  
99 Japan), and the data were collected using a self-administered online questionnaire. All  
100 participants gave informed consent, and the study was approved by the ethics committee of  
101 the University of Occupational and Environmental Health, Japan (approval number: R2-079  
102 and R3-006).

103         The baseline survey was conducted from December 22 to 25, 2020. The protocol for  
104 the baseline survey has been previously reported in detail [16]. The participants were aged  
105 20–65 years and were employed at the time of the baseline survey (N=33,087). Participants  
106 were included using cluster sampling by sex, age, region, and occupation. A total of 27,036  
107 participants were included after excluding ineligible individuals: those for which no data on  
108 company size was available, who worked in the medical or welfare sectors, or who were  
109 older than 65 at the time of the follow-up survey.

110         The follow-up survey was conducted from December 15 to 22, 2021, 1 year after

111 baseline. A total of 18,560 participants responded to the survey. Among them, respondents  
112 were excluded if they were unemployed, over 65 years of age, or employed in the health or  
113 welfare sector and thus eligible for priority vaccination at the time of the follow-up survey.  
114 Finally, 15,829 participants were included in the analysis. Figure 1 shows the flow diagram  
115 for this study.

116

#### 117 **Second COVID-19 vaccination dose status**

118 In the follow-up survey, we asked participants, “In what month did you receive the second  
119 COVID-19 vaccination?” Participants were requested to choose one of 12 options: the  
120 months of February 2021 through December 2021, or “have not received.” We then created a  
121 variable for completion status for each month after July. For example, completion by the end  
122 of September was defined as having received a second COVID-19 vaccine dose in any of the  
123 months from February through September. If a participant received the second vaccine dose  
124 in September, completion by July or August would be coded “no” but completion by  
125 September, October, November, and December would be coded “yes”.

126

#### 127 **Company size**

128 In the baseline survey, we asked participants, “How many employees are there at your  
129 company?” The participants could choose one of 10 options: 1 person (self-employed) or 2–4,

130 5–9, 10–29, 30–49, 50–99, 100–499, 500–999, 1000–9999, or 10,000 or more persons. We  
131 classified the responses into three categories: those who worked for small (1–49),  
132 medium-sized (50–999), or large (1,000 or more) companies. This classification was made  
133 because under the Industrial Safety and Health Act, the obligation to establish an  
134 occupational health management system differs depending on the size of the worksite [17].  
135 Furthermore, the government-provided workplace vaccination program was eligible for  
136 locations that could vaccinate at least 1,000 people [13].

137

#### 138 Company-arranged vaccination opportunity

139 In the follow-up survey, we asked participants, “Has your company arranged an opportunity  
140 to receive the COVID-19 vaccine at the workplace, whether or not you took advantage of the  
141 opportunity?” Participants could choose one of three response options: yes, no, or unknown.  
142 We regarded “yes” to indicate that the vaccination opportunity was arranged, and the other  
143 answers to indicate that this was not arranged.

144

#### 145 Assessment of covariates

146 Participant characteristics were collected at baseline. The covariates included socioeconomic  
147 factors, occupation, and industry. Age was classified into five groups: 20–29, 30–39, 40–49,  
148 50–59, and 60–65 years. Annual household income was classified into five categories: <2.00

149 million Japanese yen (JPY), 2.00–3.99 million JPY, 4.00–5.99 million JPY, 6.00–7.99 million  
150 JPY, and 8.00 million JPY or greater. Educational background was classified into three  
151 categories: junior high or high school, vocational school or college, and university or  
152 graduate school. Marital status was classified into three categories: married, divorced or  
153 widowed, and unmarried. Occupation was classified into 10 categories: general employee;  
154 manager; executive manager; public employee, faculty member, or non-profit organization  
155 employee; temporary or contract employee; self-employed; small office/home office;  
156 agriculture, forestry, or fishing; professional occupation (e.g., lawyer, tax accountant); and  
157 other occupations. Participants could choose one of 22 options for their work industry, which  
158 was then classified into nine categories based on the International Standard Industrial  
159 Classification of All Economic Activities: manufacturing, public service, information and  
160 communication, wholesale and retail, food service, education and religion, finance and  
161 insurance, construction, and others.

162

### 163 **Statistical analysis**

164 The odds ratios (ORs) for the association between company size and completion of the  
165 second COVID-19 vaccine dose were estimated using a multilevel logistic model nested in  
166 the prefecture of residence to account for regional variability. The multivariate model was  
167 adjusted for sex and age (Model 1) and additionally adjusted for annual household income,

168 educational background, marital status, occupation, and industry (Model 2). Finally, the  
169 model was adjusted for company-arranged vaccination opportunity (Model 3).

170 A *p*-value of less than 0.05 was considered statistically significant. All analyses were  
171 conducted using Stata (Stata Statistical Software: Release 16; StataCorp LLC, College  
172 Station, TX, USA).

173

## 174 Results

175 Table 1 shows the participant characteristics by company size. Of the 15,829 participants,  
176 4,272 (27%) worked for a large company, 5,117 (32%) for a medium-sized company, and  
177 6,440 (41%) for a small company. As the company size increased, the percentage of  
178 participants with a high annual household income and a high educational background level  
179 increased. Furthermore, as the company size increased, the opportunity for  
180 company-arranged vaccination increased: 56% for large companies, 35% for medium-sized  
181 companies, and 14% for small companies.

182 <Insert Table 1>

183 Table 2 shows the ORs for the association between company size and completion of  
184 the second COVID-19 dose by month. In the model adjusted only for age and sex (Model 1),  
185 participants who worked for a medium-sized company were significantly less likely to  
186 complete the second dose by August (OR=0.87, 95% CI: 0.79–0.94, *p*=0.001) and September

187 (OR=0.86, 95% CI: 0.78–0.93,  $p<0.001$ ) than those who worked for a large company. For  
188 small companies, the ORs decreased throughout the entire observation period, from July to  
189 December. In the model adjusted for the main socioeconomic factors (Model 2), the ORs for  
190 medium-sized and small companies tended to approach 1. For August and September, this  
191 tendency remained, but no significant difference was observed for the medium-sized  
192 companies. After adjusting for company-arranged vaccination opportunity (Model 3), the  
193 significant difference between small and large companies disappeared for the entire period  
194 analyzed. However, after October, participants who worked for medium-sized companies  
195 were significantly more likely to have received the second vaccine dose than those who  
196 worked for large companies (OR=1.14, 95% CI: 1.01–1.28,  $p<0.029$ ). In each month  
197 throughout the observation period, those who had a company-arranged vaccination  
198 opportunity were significantly more likely to have received the second vaccine dose.

199 <Insert Table 2>

200

## 201 Discussion

202 This study showed that employees of smaller companies were less likely to have received a  
203 second COVID-19 vaccine dose. In the months after the start of the workplace vaccination  
204 program, the second dose completion rate of participants who worked for medium-sized  
205 companies was lower than that of those who worked for large companies, but this difference

206 disappeared later in the observation period. The significant difference in completion rate  
207 between small company employees and large company employees remained throughout the  
208 observation period. The difference between large and medium-sized company employees  
209 could mostly be explained by differences in socioeconomic factors. However, the difference  
210 between the small and large company employees could not be explained by those factors  
211 alone, although adjusting for the socioeconomic factors reduced the difference. After  
212 adjusting for company-arranged vaccination opportunity, the difference in employee second  
213 dose completion rate between large and small companies disappeared. Furthermore,  
214 medium-size companies had higher vaccine completion coverage than large companies in the  
215 latter half of the observation period.

216         The presence of vaccine hesitancy owing to a lack of trust in vaccination and other  
217 factors has been a challenge to achieving herd immunity through vaccination. Socioeconomic  
218 factors have been found to affect vaccination intention and uptake of other vaccines, such as  
219 the seasonal influenza vaccine [18] and the H1N1 vaccine [19]. The effects of socioeconomic  
220 factors on vaccination intention for the COVID-19 vaccine have also been examined [6,7].  
221 Studies have generally found a positive association between vaccine uptake and annual  
222 income and educational background, although some studies have shown inverse associations  
223 [20, 21]. Several studies have found differences in willingness to vaccinate depending on  
224 one's occupation and industry [22-24]. In the current study, after adjusting for socioeconomic

225 factors, the difference in vaccination completion rate among employees of medium and large  
226 companies disappeared. After these adjustments, the difference between employees of small  
227 and large companies also became smaller. These findings suggest that socioeconomic factors  
228 affect the association between COVID-19 vaccination and company size in Japan.

229           In the present study, it was observed that participants who had a company-arranged  
230 vaccination opportunity were significantly more likely to have received the second vaccine  
231 dose, and after adjusting the model for the presence of a company-arranged vaccination  
232 opportunity, no significant difference in the second dose completion rate was found between  
233 employees of small and large companies for all months. These results suggests that the  
234 government's implementation of the workplace vaccination program had a positive impact on  
235 the vaccination acceptance of employees who worked for companies that participated in the  
236 program. The company-arranged vaccination opportunities may have decreased vaccine  
237 hesitancy and increased vaccination coverage. To evaluate the psychosocial factors  
238 influencing vaccine hesitancy, in 2011, the WHO Strategic Advisory Group of Experts  
239 proposed the "3C" model [4], which stands for "Confidence", "Convenience", and  
240 "Complacency." German researchers subsequently proposed the "5C" model, substituting  
241 "Constraints" for "Convenience" and adding "Calculation" and "Collective responsibility"  
242 [25]. Company-arranged vaccination opportunities are thought to increase people's  
243 confidence in a vaccine, and the availability of the vaccine at or near their workplace



244 increases its convenience. In addition, social environmental factors, such as social norms and  
245 herding effects, have been suggested to affect one's vaccine intention [26,27]. The workplace  
246 vaccination program facilitated employees' vaccination behavior to be shared among  
247 coworkers and supervisors, which may have had a direct impact on the social norms and  
248 herding effect. Previous studies on seasonal influenza vaccination in the U.S. have reported  
249 that workplace vaccination practices and recommendations are associated with higher  
250 vaccination coverage [28].

251       The influence of socioeconomic factors and company-arranged vaccination  
252 opportunities on vaccination coverage has implications for the equitable allocation of  
253 vaccines. In the workplace vaccination program, the government invited companies that  
254 wished to implement the program on the premise that at least 1,000 people could be  
255 vaccinated at a single location [13]. Multiple small companies could apply if they could  
256 jointly secure more than 1,000 people willing to be vaccinated. However, because it was  
257 necessary to arrange venues and medical personnel for the vaccination event and to  
258 coordinate costs, program utilization may vary greatly depending on company size. In Japan,  
259 employers with less than 50 full-time staff are not obligated to appoint an occupational health  
260 physician or health supervisor or to establish a health committee. This lack of obligation  
261 means that workers in small companies often do not have occupational health services  
262 available to them [17]. In addition, during the COVID-19 pandemic in Japan, there were

263 marked differences among companies of different sizes in the implementation of remote work  
264 and infection control measures [14,15]. The Japanese government's workplace vaccination  
265 program may have contributed to health disparities. Therefore, the pros and cons of a  
266 workplace vaccination program and the methods used to realize it warrant further discussion  
267 to ensure a more equitable implementation in future infectious disease outbreaks.

268           It is unclear why there was significantly higher vaccination completion among  
269 participants who worked for medium-sized companies compared with those who worked for  
270 large companies after October 2021 in the model adjusted for both socioeconomic factors and  
271 company-arranged vaccination opportunity. One possible explanation is that many employees  
272 of large companies were located in offices other than the headquarters and therefore had  
273 difficulty accessing the company-arranged vaccination opportunity. Another possibility is that,  
274 although COVID-19 vaccination was voluntary, medium-sized companies are often in a  
275 weaker business position than larger companies, and therefore they may have been more  
276 influenced by pressure from clients to vaccinate their employees in order to continue doing  
277 business.

278           This study had several limitations. First, the survey was conducted via the internet,  
279 so generalizations should be made with caution. However, we attempted to reduce any bias  
280 by using cluster sampling with stratification by sex, region, and job type. Second, the study  
281 was likely affected by recall bias. The earlier vaccination was completed, the more time had

282 elapsed by the time of the survey, which may have caused recall bias. Third, the timing of the  
283 follow-up survey might have affected the responses to the question of vaccination status in  
284 the last month, December. If a person received their second vaccine dose in the last week of  
285 December (after filling out the follow-up survey), they may have answered “unvaccinated”  
286 when asked about their vaccination status in the follow-up survey. However, the impact of  
287 this situation was likely small because second-dose vaccination was nearly complete in both  
288 the community and workplace programs by the end of November, and less than 1% of the  
289 respondents received their second vaccine dose in December.

290

## 291 Conclusion

292 During the period when COVID-19 vaccinations were being administered to the general  
293 population in Japan, the coverage of receiving a second COVID-19 vaccine dose was  
294 significantly lower for those who worked for small companies than for those who worked for  
295 large companies. This difference could mostly be explained by socioeconomic factors and the  
296 availability of a vaccination opportunity arranged by the employer. In the event of future  
297 infectious disease outbreaks, it will be necessary to enhance support of vaccination for the  
298 employees of small companies.

299

## 300 List of Abbreviations

301 COVID-19: coronavirus diseases 2019; mRNA: messenger RNA; WHO: World Health  
302 Organization; JPN: Japanese yen; OR: odds ratio; CI: confidence interval.

303

304

305

## References

- 306 1. Lu R, Zhao X, Li J, Niu P, Yang B, Peihua N, et al. Genomic characterisation and  
307 epidemiology of 2019 novel coronavirus: implications for virus origins and receptor  
308 binding. *Lancet*. 2020;395:565–74. [https://doi.org/10.1016/S0140-6736\(20\)30251-83-16](https://doi.org/10.1016/S0140-6736(20)30251-83-16).
- 309 2. Conte C, Sogni F, Affanni P, Veronesi L, Argentiero A, Esposito S. Vaccines against  
310 Coronaviruses: The State of the Art. *Vaccines*. 2020;8:309.  
311 <https://doi.org/10.3390/vaccines8020309>
- 312 3. Jin Y, Hou C, Li Y, Zheng K, Wan C. mRNA Vaccine: How to Meet the Challenge of  
313 SARS-CoV-2. *Front Immunol*. 2022;12:821538.  
314 <https://doi.org/10.3389/fimmu.2021.821538>.
- 315 4. MacDonald NE, SAGE Working Group on Vaccine Hesitancy Vaccine. Vaccine  
316 hesitancy: Definition, scope and determinants. *Vaccine*. 2015;33(34):4161-64.  
317 <https://doi.org/10.1016/j.vaccine.2015.04.036>.
- 318 5. Larson JH, Jarrett C, Eckersberger E, Smith DMD, Paterson P. Understanding vaccine  
319 hesitancy around vaccines and vaccination from a global perspective: a systematic review

- 320 of published literature, 2007-2012. *Vaccine*. 17;32(19):2150-59.
- 321 <https://doi.org/10.1016/j.vaccine.2014.01.081>.
- 322 6. Lazarus JV, Ratzan SC, Adam Palayew A et al. A global survey of potential acceptance of
- 323 a COVID-19 vaccine. 2021; 27(2):225-228. <https://doi.org/10.1038/s41591-020-1124-9>.
- 324 7. Sallam M. COVID-19 vaccine hesitancy worldwide: A concise systematic review of
- 325 vaccine acceptance rates. *Vaccines (Basel)* 2021; 9(2):160.
- 326 <https://doi.org/10.3390/vaccines9020160>.
- 327 8. National Academies of Sciences, Engineering, and Medicine; Health and Medicine
- 328 Division; Board on Population Health and Public Health Practice; Board on Health
- 329 Sciences Policy; Committee on Equitable Allocation of Vaccine for the Novel
- 330 Coronavirus. Framework for Equitable Allocation of COVID-19 Vaccine. National
- 331 Academies Press (US); 2020. <https://doi.org/10.17226/25917>
- 332 9. Okubo R, Yoshioka T, Ohfuji S, Matsuo T, Tabuchi T. COVID-19 Vaccine Hesitancy and
- 333 Its Associated Factors in Japan. *Vaccines (Basel)* 2021;9(6):662. [https://doi.org/](https://doi.org/10.3390/vaccines9060662)
- 334 [10.3390/vaccines9060662](https://doi.org/10.3390/vaccines9060662).
- 335 10. Ishimaru T, Okawara M, Ando H, Hino A, Nagata T, Tateishi S, et al. Gender differences
- 336 in the determinants of willingness to get the COVID-19 vaccine among the working-age
- 337 population in Japan. *Hum Vaccin Immunother*. 2021;17(11): 3975-81.
- 338 <https://doi.org/10.1080/21645515.2021.1947098>.

- 339 11. Prime Minister's Office of Japan. About inoculation schedule of COVID-19 vaccine [In  
340 Japanese].[https://www.kantei.go.jp/jp/headline/kansensho/vaccine\\_supply.html](https://www.kantei.go.jp/jp/headline/kansensho/vaccine_supply.html). Accessed  
341 31 March, 2022.
- 342 12. Ministry of Health, Labour and Welfare. About inoculation to medical staff etc. [In  
343 Japanese]. [https://www.mhlw.go.jp/stf/seisakunitsuite/bunya/vaccine\\_iryuujuujisha.html](https://www.mhlw.go.jp/stf/seisakunitsuite/bunya/vaccine_iryuujuujisha.html).  
344 Accessed 31 March, 2022.
- 345 13. Ministry of Health, Labour and Welfare. Notice of inoculation at the workplace [In  
346 Japanese]. [https://www.mhlw.go.jp/stf/seisakunitsuite/bunya/vaccine\\_shokuiki.html](https://www.mhlw.go.jp/stf/seisakunitsuite/bunya/vaccine_shokuiki.html).  
347 Accessed 31 March, 2022.
- 348 14. Ishimaru T, Nagata M, Hino A, Yamashita S, Tateishi S, Tsuji M. Workplace measures  
349 against COVID-19 during the winter third wave in Japan: Company size-based  
350 differences. *J Occup Health*. 2021;63(1):e12224.  
351 [Hpps://doi.org/10.1002/1348-9585.12224](https://doi.org/10.1002/1348-9585.12224).
- 352 15. Sasaki N, Imamura K, Kataoka M, Kuroda R, Tsuno K, Sawada U, et al. COVID-19  
353 measurements at the workplace in various industries and company sizes: a 2-month  
354 follow-up cohort study of full-time employees in Japan. *Environ Occup Health Practice*.  
355 2021;3. <https://doi.org/10.1539/eohp.2020-0017-OA>.
- 356 16. Fujino Y, Ishimaru T, Eguchi H, Tsuji M, Tateishi S, Ogami A, et al. Protocol for a  
357 nationwide Internet-based health survey in workers during the COVID-19 pandemic in

- 358 2020. J UOEH 2021;43(2):217-25. <https://doi.org/10.7888/juoeh.43.217>.
- 359 17. Mori K. Current Status and Issues for the Role of Occupational Health Physicians in  
360 Japan. 2018 JMA Journal. 1(1)15-21. <https://doi.org/10.31662/jmaj.2018-0011>
- 361 18. Schmid P, Rauber D, Betsch C, Lidolt G, Denker M-L. Barriers of Influenza Vaccination  
362 Intention and Behavior – A Systematic Review of Influenza Vaccine Hesitancy, 2005 –  
363 2016. PLoS One. 2017;12:e0170550. <https://doi.org/10.1371/journal.pone.0170550>.
- 364 19. Gargano LM, Painter JE, Sales JM, Morfaw C, Jones LM, Murray D, et al. Seasonal and  
365 2009 H1N1 influenza vaccine uptake, predictors of vaccination and self-reported barriers  
366 to vaccination among secondary school teachers and staff. Hum Vaccin. 2011; 7(1):89–95.  
367 <https://doi.org/10.4161/hv.7.1.13460>.
- 368 20. Hak E, Schönbeck Y, De Melker H, Van Essen GA, Sanders EA. Negative attitude of  
369 highly educated parents and health care workers towards future vaccinations in the Dutch  
370 childhood vaccination program. Vaccine 2005; 23 (24): 3103-7. [https://doi.org/](https://doi.org/10.1016/j.vaccine.2005.01.074)  
371 [10.1016/j.vaccine.2005.01.074](https://doi.org/10.1016/j.vaccine.2005.01.074).
- 372 21. Wei F, Mullooly JP, Goodman M, McCarty MC, Hanson AM, Crane B, et al.  
373 Identification and characteristics of vaccine refusers. BMC Pediatr 2009; 9: 18.  
374 [https://doi: 10.1186/1471-2431-9-18](https://doi.org/10.1186/1471-2431-9-18).
- 375 22. King WC, Rubinstein M, Reinhart A, Mejia R. COVID-19 vaccine hesitancy  
376 January-May 2021 among 18-64 year old US adults by employment and occupation. Prev

- 377 Med Rep. 2021;24:101569. <https://doi.org/10.1016/j.pmedr.2021.101569>.
- 378 23. Wang K, Wong EL, Ho K, Cheung AW, Yau PS, Dong D, et al. Change of willingness to  
379 accept COVID-19 vaccine and reasons of vaccine hesitancy of working people at  
380 different waves of local epidemic in Hong Kong, China: Repeated cross-sectional surveys.  
381 Vaccines (Basel). 2021;9(1):62. <https://doi.org/10.3390/vaccines9010062>.
- 382 24. Dorman C, Perera A, Condon C, Chau C, Qian J, Kalk K, et al. Factors associated with  
383 willingness to be vaccinated against COVID-19 in a large convenience sample. J  
384 Community Health. 2021;46(5):1013-19. <https://doi.org/10.1007/s10900-021-00987-0>.
- 385 25. Betsch C, Schmid P, Heinemeier D, Korn L, Holtmann C, Böhm R. Beyond confidence:  
386 Development of a measure assessing the 5C psychological antecedents of vaccination.  
387 PLoS One. 2018;13(12):e0208601. <https://doi.org/10.1371/journal.pone.0208601>.
- 388 26. Kang GJ, Culp RK, Abbas KM. Facilitators and barriers of parental attitudes and beliefs  
389 toward school-located influenza vaccination in the United States: Systematic review.  
390 Vaccine 2017;35(16):1987-95. <https://doi.org/10.1016/j.vaccine.2017.03.014>.
- 391 27. Agranov M, Elliott M, Ortoleva P. The importance of Social Norms against Strategic  
392 Effects: The case of Covid-19 vaccine uptake. Econ Lett 2021;206:109979.  
393 <https://doi.org/10.1016/j.econlet.2021.109979>.
- 394 28. Luz PM, Johnson RE, Brown HE. Workplace availability, risk group and perceived  
395 barriers predictive of 2016-17 influenza vaccine uptake in the United States: A



396 cross-sectional study. Vaccine. 2017;35(43):5890-5896.

397 <https://doi.org/10.1016/j.vaccine.2017.08.078>.

398

399 **Figure title**

400 **Figure 1. Flow diagram of the study participants**

401

402 **Declarations**

403 **Ethical approval and consent to participate**

404 This study was approved by the ethics committee of the University of Occupational and  
405 Environmental Health, Japan (reference nos. R2-079 and R3-006). Informed consent was  
406 obtained from all participants via the survey website.

407

408 **Consent for publication**

409 Not applicable.

410

411 **Availability of data and material**

412 Data available on request from authors.

413 **Competing interests**

414 The authors declare that they have no competing interests.

415

416 **Funding**

417 The study was supported and partly funded by research grants from the University of  
418 Occupational and Environmental Health, Japan (no grant number), the Japanese Ministry of  
419 Health, Labour and Welfare (H30-josei-ippan-002, H30-roudou-ippan-007, 19JA1004,  
420 20JA1006, 210301-1, and 20HB1004), Anshin Zaidan (no grant number), the Collabo-Health

421 Study Group (no grant number), Hitachi Systems, Ltd. (no grant number), and scholarship  
422 donations from Chugai Pharmaceutical Co., Ltd. (no grant number). The funders were not  
423 involved in the study design, collection, analysis, or interpretation of data, the writing of this  
424 article, or the decision to submit it for publication.

425

#### 426 Authors' contributions

427 KM designed the analysis, analyzed the data, and wrote the manuscript. TM designed the  
428 analysis and reviewed the manuscript. TM created the questionnaire, advised on the study  
429 design and data interpretation, and reviewed the manuscript. HA, AH, ST, MT, and SM  
430 reviewed the manuscript and advised on the data interpretation. YF was chairperson of the  
431 study group, created the questionnaire, advised on the data interpretation, and reviewed the  
432 manuscript.

433

#### 434 Acknowledgments

435 The current members of the CORoNa Work Study, in alphabetical order, are as follows: Dr. Hajime Ando,  
436 Dr. Hisashi Eguchi, Dr. Yoshihisa Fujino (present chairperson of the study group), Dr. Arisa Harada, Dr.  
437 Ayako Hino, Dr. Kazunori Ikegami, Dr. Tomohiro Ishimaru, Dr. Kyoko Kitagawa, Ms. Ning Liu, Dr.  
438 Kosuke Mafune, Dr. Shinya Matsuda, Dr. Ryutaro Matsugaki, Dr. Koji Mori, Dr. Keiji Muramatsu, Dr.  
439 Masako Nagata, Dr. Tomohisa Nagata, Dr. Akira Ogami, Dr. Makoto Okawara, Dr. Rie Tanaka, Dr.

440 Seiichiro Tateishi, Dr. Shinya Matsuda, Dr. Tomohiro Ishimaru, and Dr. Tomohisa Nagata. All members are  
441 affiliated with the University of Occupational and Environmental Health, Japan. We also thank Katherine  
442 Thieltges from Edanz (<https://jp.edanz.com/ac>) for editing a draft of this manuscript.  
443

444 Table 1. Participant characteristics according to company size

|                                                                      | Size of belonging company (Number of employees) |                 |              |
|----------------------------------------------------------------------|-------------------------------------------------|-----------------|--------------|
|                                                                      | Large (1000 or more)                            | Medium (50-999) | Small (1-49) |
| Total                                                                | 4272                                            | 5117            | 6440         |
| Age                                                                  |                                                 |                 |              |
| 20-29                                                                | 185 (4.3%)                                      | 259 (5.1%)      | 173 (2.7%)   |
| 30-39                                                                | 611 (14.3%)                                     | 764 (14.9%)     | 769 (11.9%)  |
| 40-49                                                                | 1222 (28.6%)                                    | 1601 (31.3%)    | 1898 (29.5%) |
| 50-59                                                                | 1755 (41.1%)                                    | 1929 (35.7%)    | 2511 (39.0%) |
| 60-65                                                                | 499 (11.7%)                                     | 664 (13.0%)     | 1089 (16.9%) |
| Sex                                                                  |                                                 |                 |              |
| Men                                                                  | 2781 (65.1%)                                    | 3172 (62.0%)    | 3785 (58.8%) |
| Women                                                                | 1491 (34.9%)                                    | 1945 (38.0%)    | 2665 (41.2%) |
| Annual household income (million JPY)                                |                                                 |                 |              |
| <2                                                                   | 128 (3.0)                                       | 226 (4.4%)      | 660 (10.3%)  |
| ≥2 and <4                                                            | 514 (12.0%)                                     | 990 (19.3%)     | 1594 (24.8%) |
| ≥4 and <6                                                            | 828 (19.4%)                                     | 1316 (25.7%)    | 1610 (25.0%) |
| ≥6 and <8                                                            | 997 (23.3%)                                     | 1068 (20.9%)    | 1105 (17.2%) |
| ≥8                                                                   | 1805 (42.3%)                                    | 1517 (29.6%)    | 1471 (22.8%) |
| Educational background                                               |                                                 |                 |              |
| Junior high or high school                                           | 1018 (23.8%)                                    | 1426 (27.9%)    | 2117 (32.9%) |
| Vocational school, junior college or technical school                | 613 (14.4%)                                     | 1003 (19.6%)    | 1575 (24.5%) |
| University or graduate school                                        | 2641 (61.8%)                                    | 2688 (52.5%)    | 2748 (42.7%) |
| Marital status                                                       |                                                 |                 |              |
| Married                                                              | 1244 (29.1%)                                    | 1704 (33.3%)    | 2296 (35.7%) |
| Widowed/divorced                                                     | 339 (7.9%)                                      | 432 (8.4%)      | 755 (11.7%)  |
| Never married                                                        | 2689 (62.9%)                                    | 2981 (58.3%)    | 3389 (58.3%) |
| Occupation                                                           |                                                 |                 |              |
| General employee                                                     | 2104 (49.3%)                                    | 2773 (54.2%)    | 2423 (37.6%) |
| Manager                                                              | 691 (16.2%)                                     | 753 (14.7%)     | 382 (5.9%)   |
| Executive manager                                                    | 31 (0.7%)                                       | 107 (2.1%)      | 494 (7.7%)   |
| Public employee, faculty member, or non-profit organization employee | 806 (18.9%)                                     | 606 (11.8%)     | 354 (5.5%)   |
| Temporary/contract employee                                          | 603 (14.1%)                                     | 810 (15.8%)     | 340 (5.3%)   |
| Independent business (commercial and industrial services)            | 9 (0.2%)                                        | 15 (0.3%)       | 1548 (24.0%) |
| Small office/home office                                             | 3 (0.1%)                                        | 3 (0.1%)        | 270 (4.2%)   |
| Agricultural, forestry, and fishing industries                       | 2 (0.0%)                                        | 3 (0.1%)        | 135 (2.1%)   |
| Professional occupation (lawyer, tax accountant, etc.)               | 11 (0.3%)                                       | 14 (0.3%)       | 140 (2.2%)   |
| Other occupation                                                     | 12 (0.3%)                                       | 33 (0.6%)       | 354 (5.5%)   |
| Industry                                                             |                                                 |                 |              |
| Manufacturing                                                        | 1069 (25.0%)                                    | 1179 (23.0%)    | 755 (11.7%)  |
| Public service                                                       | 638 (14.9%)                                     | 389 (7.6%)      | 203 (3.2%)   |
| Information and technology                                           | 312 (7.3%)                                      | 331 (6.5%)      | 287 (4.5%)   |
| Retail and wholesales                                                | 244 (5.7%)                                      | 355 (6.9%)      | 629 (9.8%)   |
| Eating/drinking                                                      | 110 (2.6%)                                      | 182 (3.6%)      | 513 (8.0%)   |
| Education and religion                                               | 275 (6.4%)                                      | 417 (8.1%)      | 507 (7.9%)   |
| Finance                                                              | 434 (10.2%)                                     | 213 (4.2%)      | 161 (2.5%)   |
| Construction                                                         | 96 (2.3%)                                       | 139 (2.7%)      | 428 (6.7%)   |
| Other                                                                | 1064 (25.6%)                                    | 1912 (37.4%)    | 2957 (45.9%) |
| Vaccination arranged by company                                      |                                                 |                 |              |
| Yes                                                                  | 2383 (55.8%)                                    | 1780 (34.8%)    | 914 (14.2%)  |
| No                                                                   | 1889 (44.2%)                                    | 3337 (65.2%)    | 5526 (85.8%) |
| Month of 2nd COVID-19 vaccination                                    |                                                 |                 |              |
| February-June                                                        | 161 (3.0%)                                      | 205 (4.0%)      | 197 (3.1%)   |
| July                                                                 | 450 (10.5%)                                     | 467 (9.1%)      | 607 (9.4%)   |
| August                                                               | 1267 (29.7%)                                    | 4354 (26.5%)    | 1550 (24.1%) |
| September                                                            | 941 (22.0%)                                     | 1140 (22.3%)    | 1380 (21.4%) |
| October                                                              | 774 (18.1%)                                     | 1063 (20.8%)    | 1212 (18.8%) |
| November                                                             | 240 (5.6%)                                      | 319 (6.2%)      | 420 (6.5%)   |
| December                                                             | 21 (0.5%)                                       | 35 (0.7%)       | 40 (0.6%)    |
| Non-vaccinated                                                       | 418 (9.8%)                                      | 534 (10.4%)     | 1034 (16.1%) |

445

446 Table 2 Association between company size and completion of the second COVID-19 vaccine dose

| Second vaccination   | model 1    |           |        | model 2 |      |           | model 3 |      |           |         |
|----------------------|------------|-----------|--------|---------|------|-----------|---------|------|-----------|---------|
|                      | Comp. size | OD        | 95%CI  | P value | OD   | 95%CI     | P value | OD   | 95%CI     | P value |
| by July              |            |           |        |         |      |           |         |      |           |         |
| Large                | Ref.       |           |        |         | Ref. |           |         | Ref. |           |         |
| Medium               | 0.93       | 0.82-1.05 | 0.229  |         | 0.98 | 0.86-1.10 | 0.691   | 1.06 | 0.94-1.21 | 0.330   |
| Small                | 0.77       | 0.69-0.87 | <0.001 |         | 0.79 | 0.69-0.90 | 0.002   | 0.94 | 0.82-1.07 | 0.350   |
| Vaccination by comp. |            |           |        |         |      |           |         | 1.56 | 1.40-1.74 | <0.001  |
| by August            |            |           |        |         |      |           |         |      |           |         |
| Large                | Ref.       |           |        |         | Ref. |           |         | Ref. |           |         |
| Medium               | 0.87       | 0.79-0.94 | 0.001  |         | 0.92 | 0.84-1.00 | 0.065   | 1.05 | 0.96-1.15 | 0.277   |
| Small                | 0.67       | 0.62-0.73 | <0.001 |         | 0.76 | 0.69-0.83 | <0.001  | 0.98 | 0.89-1.08 | 0.692   |
| Vaccination by comp. |            |           |        |         |      |           |         | 1.98 | 1.83-2.15 | <0.001  |
| by September         |            |           |        |         |      |           |         |      |           |         |
| Large                | Ref.       |           |        |         | Ref. |           |         | Ref. |           |         |
| Medium               | 0.86       | 0.78-0.93 | 0.001  |         | 0.92 | 0.84-1.01 | 0.085   | 1.04 | 0.95-1.15 | 0.349   |
| Small                | 0.64       | 0.59-0.70 | <0.001 |         | 0.77 | 0.70-0.84 | <0.001  | 0.97 | 0.88-1.07 | 0.541   |
| Vaccination by comp. |            |           |        |         |      |           |         | 1.90 | 1.76-2.07 | <0.001  |
| by October           |            |           |        |         |      |           |         |      |           |         |
| Large                | Ref.       |           |        |         | Ref. |           |         | Ref. |           |         |
| Medium               | 0.92       | 0.82-1.02 | 0.127  |         | 1.00 | 0.89-1.12 | 0.971   | 1.14 | 1.01-1.28 | 0.029   |
| Small                | 0.54       | 0.48-0.61 | <0.001 |         | 0.75 | 0.67-0.84 | <0.001  | 0.95 | 0.85-1.07 | 0.377   |
| Vaccination by comp. |            |           |        |         |      |           |         | 2.05 | 1.84-2.27 | <0.001  |
| by November          |            |           |        |         |      |           |         |      |           |         |
| Large                | Ref.       |           |        |         | Ref. |           |         | Ref. |           |         |
| Medium               | 0.93       | 0.81-1.10 | 0.218  |         | 1.01 | 0.88-1.15 | 0.918   | 1.15 | 1.01-1.32 | 0.042   |
| Small                | 0.54       | 0.48-0.61 | <0.001 |         | 0.73 | 0.64-0.83 | <0.001  | 0.94 | 0.82-1.08 | 0.362   |
| Vaccination by comp. |            |           |        |         |      |           |         | 2.14 | 1.88-2.43 | <0.001  |
| by December          |            |           |        |         |      |           |         |      |           |         |
| Large                | Ref.       |           |        |         | Ref. |           |         | Ref. |           |         |
| Medium               | 0.94       | 0.82-1.07 | 0.329  |         | 1.02 | 0.89-1.17 | 0.759   | 1.17 | 1.02-1.35 | 0.029   |
| Small                | 0.54       | 0.48-0.61 | <0.001 |         | 0.73 | 0.64-0.83 | <0.001  | 0.93 | 0.81-1.07 | 0.317   |
| Vaccination by comp. |            |           |        |         |      |           |         | 2.14 | 1.83-2.15 | <0.001  |

447 model 1: adjusted for age and sex

448 model 2: model 1+ adjusted for annual household income, education, marital status, occupation and industry

449 model 3: model 2 + adjusted for company-arranged vaccination

450 Size of company: large (1-49); medium-sized (50-999); large (1000 or more)

451 Vaccination by comp.: vaccination arranged by company

452

453

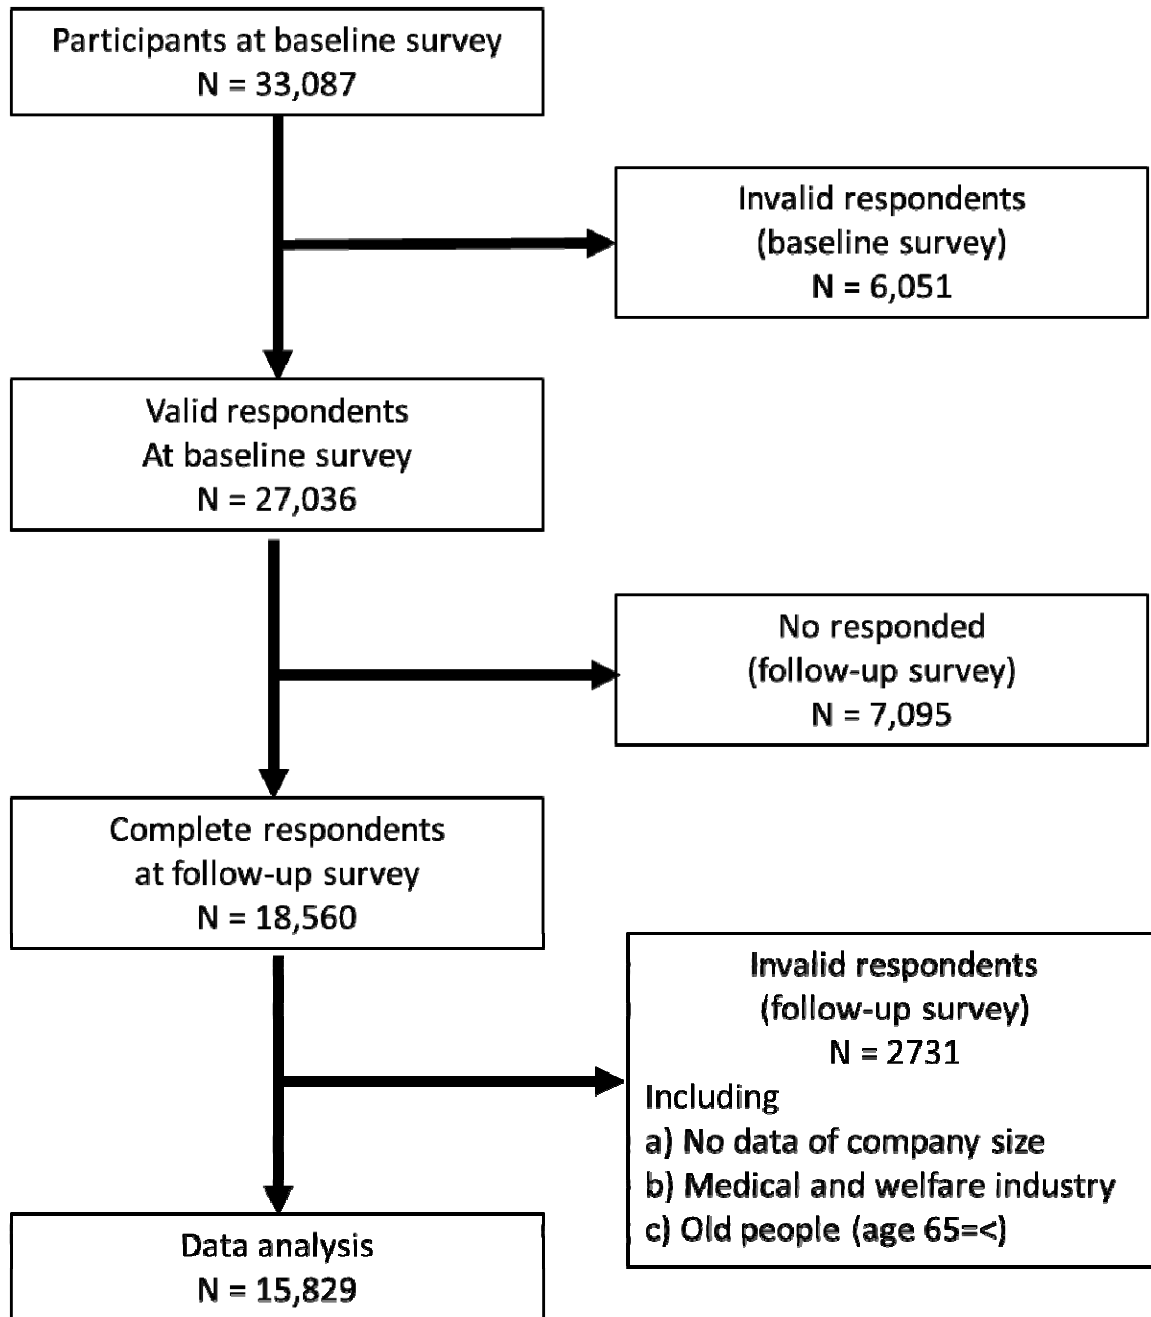

454

455

456 Fig 1

457

458

459

460

461
